# Supplementary material
Source: PubMed Central journal article supplement (PMC2041448)

**Supplemental Figure 1 The DNA sequences used to make the DHJS phagemid vectors.**

The loxP and homologous region fragments were made from complementary oligonucleotides of the sequences shown, while sequence A was amplified from the Top3 $\alpha$  gene and sequence B was amplified from the tetracyclin resistance gene using the primers shown. The final configuration of the segments is illustrated, with the restriction enzyme sites indicated below the schematic (\* these sites are destroyed after ligation into the vector). The inserts were cloned into the multiple cloning sites of pBluescript SK+ and pBluescript SK- to make the 4 different phagemid vectors used to construct the DHJS.

Sup Figure 1

| <u>Segment</u> | <u>Sequence</u>                                                                                                              |
|----------------|------------------------------------------------------------------------------------------------------------------------------|
| LoxP1          | AGCTAGATCTATAACTTCGTATAGCATAACATTATACGAAGTTATG<br>TCTAGATATTGAAGCATATCGTATGTAATATGCTTCAATACTTAA                              |
| Homologous1    | AATTCAGGACCTTGAACGCGAGGTGCGCGGCTGTCAGGATTACGCGTGATTATCTGGC<br>GTCCTGGAACCTTGCCTCCACGCGCCGACAGTCCTAATGCGCACTAATAGACCGGGCC     |
| Homologous2    | GGCCGCATCCGAGCCATTGGAAGATTAGGTTCTGCTAGCGCACACAATTGATGACTTGAT<br>CGTAGGCTCGGTAACCTTCTAATCCAAGACGATCGCGTGTGTTAACTACTGAACTAGATC |
| LoxP2          | CTAGAATAACTTCGTATAGCATAACATTATACGAAGTTATCATATGAGCT<br>TTATTGAAGCATATCGTATGTAATATGCTTCAATAGTATAC                              |
| <u>Primers</u> | <u>Sequence</u>                                                                                                              |
| Sequence Af    | CCCGGGCTACTCGGTGTACAACAAGGTCTTTCG                                                                                            |
| Sequence Ar    | GCGGCCGCACATCAATAATCTCGTAGCCAATGTTC                                                                                          |
| Sequence Bf    | CCCGGGGCTATATGCGTTGATGCAATTTTC                                                                                               |
| Sequence Br    | GCGGCCGCCGAAGTGGCGAGCCCGATC                                                                                                  |

Assembly of the DNA fragments in pBlueScript SK+/- MCS

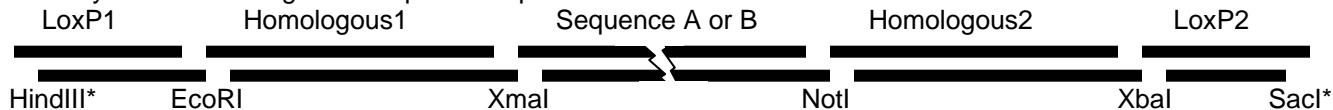

Supplement: NIHMS32321-supplement-SFig1.pdf [file NIHMS32321-supplement-SFig1.pdf]
